# Supplementary material for: Effect of a MUC5AC Antibody (NPC-1C) Administered With Second-Line Gemcitabine and Nab-Paclitaxel on the Survival of Patients With Advanced Pancreatic Ductal Adenocarcinoma: A Randomized Clinical Trial
Source: PubMed Central journal article supplement — JAMA Netw Open. 2023 Jan 5;6(1):e2249720. doi: 10.1001/jamanetworkopen.2022.49720 (PMC9856813; doi:10.1001/jamanetworkopen.2022.49720), 2023-01-05

## Supplemental Online Content

Huffman BM, Basu Mallick A, Horick NK, et al. Effect of a MUC5AC antibody (NPC-1C) administered with second-line gemcitabine and nab-paclitaxel on the survival of patients with advanced pancreatic ductal adenocarcinoma: a randomized clinical trial. *JAMA Netw Open*. 2023;6(1):e2249720. doi:10.1001/jamanetworkopen.2022.49720

**eTable 1.** NPC-1C Staining Score

**eTable 2.** Best Radiological Response According to RECIST Criteria

**eTable 3.** Frequency of Adverse Events by Grade That Were Possibly, Probably, or Definitely Related to Protocol Treatment

**eTable 4.** Grade 3 or 4 Adverse Events Possibly, Probably, or Definitely Associated with Protocol Treatment

**eTable 5.** Relative Treatment Dose Intensity (RTDI)

**eTable 6.** Chemotherapy Dose Reductions

**eTable 7.** Modifications of Chemotherapy Administration Schedule

**eTable 8.** Univariate Analysis of Prognostic Features Associated with Overall Survival

**eFigure 1.** CONSORT Diagram for Patient Disposition

**eFigure 2.** Subgroup Analysis of Demographic and Baseline Disease Characteristics in Relation to Overall Survival

**eFigure 3.** Overall Survival of Patients Based on Presence of Prognostic Factors

This supplemental material has been provided by the authors to give readers additional information about their work.

**eTable 1: NPC-1C staining score**

| NPC1C staining score<br>(% tumor cells stained) | N (%)      |
|-------------------------------------------------|------------|
| 20-40                                           | 35 (44.8%) |
| 41-60                                           | 17 (21.8%) |
| 61-80                                           | 14 (17.9%) |
| 81-100                                          | 12 (15.4%) |

**eTable 2: Best Radiological Response According to RECIST Criteria**

| <b>Response</b>               | <b>Gemcitabine/nab-Paclitaxel/NPC-1C (N=32)</b> | <b>Gemcitabine/nab-Paclitaxel (N=34)</b> | <b>All Patients (N=66)</b> |
|-------------------------------|-------------------------------------------------|------------------------------------------|----------------------------|
| Complete Response             | 0                                               | 0                                        | 0                          |
| Partial Response              | 1 (3%, 95% CI: 0.4%-20%)                        | 1 (3%, 95% CI: 0.4%-19%)                 | 2 (3%, 95% CI: 0.7%-12%)   |
| Stable Disease for >16 weeks  | 8 (25%, 95% CI: 13%-43%)                        | 7 (21%, 95% CI: 10%-38%)                 | 15 (23%, 95% CI: 14%-35%)  |
| Stable Disease for < 16 weeks | 4 (13%, 95% CI: 5%-29%)                         | 7 (21%, 95% CI: 10%-38%)                 | 11 (17%, 95% CI: 9%-28%)   |
| Progressive Disease           | 19 (59%, 95% CI: 42%-75%)                       | 19 (56%, 95% CI: 39%-72%)                | 38 (58%, 95% CI: 45%-69%)  |

**eTable 3: Frequency of Adverse Events by Grade That Were Possibly, Probably, or Definitely Related to Protocol Treatment**

| <b>Grade of Toxicity</b> | <b>Gemcitabine/nab-paclitaxel/NPC-1C (n=38)</b> | <b>Gemcitabine/nab-paclitaxel alone (N=40)</b> | <b>p value (Fisher exact test)</b> |
|--------------------------|-------------------------------------------------|------------------------------------------------|------------------------------------|
| Any grade toxicity       | 38 (100%)                                       | 40 (100%)                                      | 1                                  |
| Grade ≥3 toxicity        | 27 (78%)                                        | 34 (85%)                                       | 0.17                               |

**eTable 4: Grade 3 or 4 Adverse Events Possibly, Probably, or Definitely Associated with Protocol Treatment**

| All Grade ≥3 Events          | All Patients (n=78) | Gemcitabine/nab-paclitaxel/NPC-1C (n=38) | Gemcitabine/nab-paclitaxel (n=40) | P value <sup>a</sup> |
|------------------------------|---------------------|------------------------------------------|-----------------------------------|----------------------|
| Abdominal Pain               | 1 (1%)              | 1 (3%)                                   | 0 (0%)                            | 0.49                 |
| Anemia                       | 19 (24%)            | 15 (39%)                                 | 4 (10%)                           | 0.003                |
| Anorexia                     | 1 (1%)              | 1 (3%)                                   | 0 (0%)                            | 0.49                 |
| Coagulopathy                 | 1 (1%)              | 0 (0%)                                   | 1 (3%)                            | 1.0                  |
| Colitis                      | 1 (1%)              | 1 (3%)                                   | 0 (0%)                            | 0.49                 |
| Dehydration                  | 1 (1%)              | 1 (3%)                                   | 0 (0%)                            | 0.49                 |
| Diarrhea                     | 1 (1%)              | 0 (0%)                                   | 1 (3%)                            | 1.0                  |
| Edema                        | 1 (1%)              | 0 (0%)                                   | 1 (3%)                            | 1.0                  |
| Fatigue                      | 6 (8%)              | 5 (13%)                                  | 1 (3%)                            | 0.1                  |
| Fever                        | 1 (1%)              | 1 (3%)                                   | 0 (0%)                            | 0.49                 |
| Hyperglycemia                | 1 (1%)              | 0 (0%)                                   | 1 (3%)                            | 1.0                  |
| Hypertension                 | 1 (1%)              | 1 (3%)                                   | 0 (0%)                            | 0.49                 |
| Hyponatremia                 | 1 (1%)              | 0 (0%)                                   | 1 (3%)                            | 1.0                  |
| Hypophosphatemia             | 2 (3%)              | 1 (3%)                                   | 1 (3%)                            | 1.0                  |
| Leukopenia                   | 13 (17%)            | 8 (21%)                                  | 5 (13%)                           | 0.37                 |
| Abnormal liver function test | 8 (10%)             | 6 (16%)                                  | 2 (5%)                            | 0.15                 |
| Lymphopenia                  | 6 (8%)              | 3 (8%)                                   | 3 (8%)                            | 1.0                  |
| Mucositis                    | 1 (1%)              | 0 (0%)                                   | 1 (3%)                            | 1.0                  |
| Nausea                       | 1 (1%)              | 0 (0%)                                   | 1 (3%)                            | 1.0                  |
| Neutropenia                  | 26 (33%)            | 14 (37%)                                 | 12 (30%)                          | 0.63                 |
| Pancytopenia                 | 2 (3%)              | 1 (3%)                                   | 1 (3%)                            | 1.0                  |
| Peripheral Neuropathy        | 4 (5%)              | 1 (3%)                                   | 3 (8%)                            | 0.62                 |
| Pneumonitis                  | 1 (1%)              | 1 (3%)                                   | 0 (0%)                            | 0.49                 |
| Rectal hemorrhage            | 1 (1%)              | 0 (0%)                                   | 1 (3%)                            | 1.0                  |
| Thrombocytopenia             | 20 (26%)            | 12 (32%)                                 | 8 (20%)                           | 0.3                  |
| Urinary tract infection      | 1 (1%)              | 0 (0%)                                   | 1 (3%)                            | 1.0                  |
| Viral pharyngitis            | 1 (1%)              | 0 (0%)                                   | 1 (3%)                            | 1.0                  |

<sup>a</sup> P value calculated from Fisher's exact test comparing Gemcitabine/nab-paclitaxel/NPC-1C to Gemcitabine/nab-paclitaxel.

**eTable 5: Relative Treatment Dose Intensity (RTDI)**

| <b>Gemcitabine dosing</b>                                                                                                                                                                                                                                                                                                                                                                                                                                                                                             | <b>All patients</b>      | <b>Gemcitabine/nab-paclitaxel</b> | <b>Gemcitabine/nab-paclitaxel/NPC-1C</b> | <b>P value (Wilcoxon-Mann-Whitney test)</b> |
|-----------------------------------------------------------------------------------------------------------------------------------------------------------------------------------------------------------------------------------------------------------------------------------------------------------------------------------------------------------------------------------------------------------------------------------------------------------------------------------------------------------------------|--------------------------|-----------------------------------|------------------------------------------|---------------------------------------------|
| Mean RTDI <sup>a</sup>                                                                                                                                                                                                                                                                                                                                                                                                                                                                                                | 73.4 (95% CI: 69.3-77.6) | 75.2 (95% CI: 68.8-81.6)          | 72.4 (95% CI: 66.1-77.2)                 | 0.37                                        |
| Median RTDI (Q1-Q3)                                                                                                                                                                                                                                                                                                                                                                                                                                                                                                   | 69.7 (33-100)            | 72.26 (49-100)                    | 68.9 (47-100)                            |                                             |
| <b>Nab-paclitaxel dosing</b>                                                                                                                                                                                                                                                                                                                                                                                                                                                                                          |                          |                                   |                                          |                                             |
| Mean RTDI                                                                                                                                                                                                                                                                                                                                                                                                                                                                                                             | 73.6 (95% CI: 69.3-77.9) | 75.3 (95% CI: 68.9-81.7)          | 71.8 (95% CI: 65.9-77.7)                 | 0.42                                        |
| Median RTDI (Q1-Q3)                                                                                                                                                                                                                                                                                                                                                                                                                                                                                                   | 69.7 (33-100)            | 73.3 (48.9-100)                   | 68.9 (46.7-100)                          |                                             |
| <p><sup>a</sup> The relative treatment dose intensity (RTDI) of gemcitabine and nab-paclitaxel was calculated as the ratio of the actual cumulative chemotherapy dose to the protocol-specified cumulative dose. The protocol-specified cumulative dose was calculated by looking at the protocol defined dose for patients completing three cycles of therapy. For patients who discontinued the trial before cycle 3, the protocol specified dose was defined by the cycle that the patient came off the study.</p> |                          |                                   |                                          |                                             |

**eTable 6: Chemotherapy Dose Reductions**

| <b>Gemcitabine/Nab-paclitaxel/NPC-1C Arm</b>                                                   |                      |                |                |                |
|------------------------------------------------------------------------------------------------|----------------------|----------------|----------------|----------------|
|                                                                                                | All Cycles<br>(n=38) | Cycle 1 (n=38) | Cycle 2 (n=33) | Cycle 3 (n=18) |
| Gemcitabine                                                                                    |                      |                |                |                |
| 800 mg/m <sup>2</sup>                                                                          | 19 (50%)             | 18 (47%)       | 12 (36%)       | 6 (33%)        |
| 600 mg/m <sup>2</sup>                                                                          | 9 (24%)              | 2 (5%)         | 5 (15%)        | 5 (28%)        |
| Nab-paclitaxel                                                                                 |                      |                |                |                |
| 100 mg/m <sup>2</sup>                                                                          | 16 (42%)             | 17 (45%)       | 11 (33%)       | 4 (24%)        |
| 75 mg/m <sup>2</sup>                                                                           | 11 (29%)             | 2 (5%)         | 5 (15%)        | 6 (35%)        |
| Held                                                                                           | 0 (0%)               | 0 (0%)         | 0 (0%)         | 1 (6%)         |
| <b>Gemcitabine/Nab-paclitaxel Arm</b>                                                          |                      |                |                |                |
|                                                                                                | All Cycles<br>(n=40) | Cycle 1 (n=40) | Cycle 2 (n=32) | Cycle 3 (n=20) |
| Gemcitabine                                                                                    |                      |                |                |                |
| 800 mg/m <sup>2</sup>                                                                          | 16 (40%)             | 12 (30%)       | 10 (31%)       | 5 (25%)        |
| 600 mg/m <sup>2</sup>                                                                          | 9 (23%)              | 4 (10%)        | 4 (13%)        | 4 (20%)        |
| Nab-paclitaxel                                                                                 |                      |                |                |                |
| 100 mg/m <sup>2</sup>                                                                          | 15 (38%)             | 12 (30%)       | 9 (29%)        | 4 (22%)        |
| 75 mg/m <sup>2</sup>                                                                           | 10 (25%)             | 4 (10%)        | 3 (10%)        | 5 (28%)        |
| Held                                                                                           | 0 (0%)               | 0 (0%)         | 1 (3%)         | 2 (10%)        |
| P values <sup>a</sup><br>(Gemcitabine/nab-<br>paclitaxel)                                      | 0.54/0.74            | 0.33/0.41      | 0.84/0.78      | 0.65/0.91      |
| <sup>a</sup> P values compared difference in dose reductions of each drug between the two arms |                      |                |                |                |
|                                                                                                |                      |                |                |                |

**eTable 7: Modifications of Chemotherapy Administration Schedule**

| <b>Gemcitabine/Nab-paclitaxel/NPC-1C Arm</b>             |                      |                |                |                |
|----------------------------------------------------------|----------------------|----------------|----------------|----------------|
|                                                          | All Cycles<br>(n=38) | Cycle 1 (n=38) | Cycle 2 (n=33) | Cycle 3 (n=18) |
| Continue 3 weeks on/<br>1 week off (N,%)                 | 9 (23.7%)            | 18 (47.4%)     | 15 (45.5%)     | 9 (50%)        |
| 2 weeks on/ 2 weeks<br>off (N, %)                        | 10 (26.3%)           | 7 (18.4%)      | 9 (27.3%)      | 5 (27.8%)      |
| 1 week on/1 week off<br>(N,%)                            | 15 (39.5%)           | 12 (31.6%)     | 6 (18.2%)      | 4 (22.2%)      |
| 1 week on/3 weeks off<br>(N,%)                           | 4 (10.5%)            | 1 (2.6%)       | 3 (9.1%)       | 0 (0%)         |
| <b>Gemcitabine/Nab-paclitaxel Arm</b>                    |                      |                |                |                |
|                                                          | All Cycles<br>(n=40) | Cycle 1 (n=40) | Cycle 2 (n=32) | Cycle 3 (n=20) |
| Continue 3 weeks on/<br>1 week off (N,%)                 | 14 (35%)             | 26 (65%)       | 20 (62.5%)     | 7 (35%)        |
| 2 weeks on/2 weeks<br>off (N, %)                         | 10 (25%)             | 7 (17.5%)      | 8 (25%)        | 4 (20%)        |
| 1 week on/1 week off<br>(N,%)                            | 6 (15%)              | 3 (7.5%)       | 3 (9.4%)       | 4 (20%)        |
| 1 week on/3 weeks off<br>(N,%)                           | 10 (25%)             | 4 (10%)        | 1 (3.1%)       | 5 (25%)        |
| P value between<br>treatment arms (Fisher<br>exact test) | 0.06                 | 0.03           | 0.46           | 0.15           |



**eTable 8: Univariate analysis of Prognostic Features Associated with Overall Survival**

| Characteristic                                                                                         | Reference                      | Comparator                                | Hazard Ratio | 95% Confidence Interval | p value |
|--------------------------------------------------------------------------------------------------------|--------------------------------|-------------------------------------------|--------------|-------------------------|---------|
| <b>Treatment</b>                                                                                       | Gemcitabine/<br>nab-paclitaxel | Gemcitabine/<br>nab-paclitaxel/<br>NPC-1C | 1.34         | 0.84-2.13               | 0.2252  |
| <b>Age</b>                                                                                             | Age < 50 years                 | Age ≥ 50 years                            | 1.07         | 0.51-2.23               | 0.8642  |
| <b>Sex</b>                                                                                             | Male                           | Female                                    | 1.06         | 0.66-1.72               | 0.7999  |
| <b>ECOG performance status</b>                                                                         | 0                              | 1                                         | 1.24         | 0.76-2.02               | 0.3947  |
| <b>Stage</b>                                                                                           | Locally advanced               | Metastatic                                | 1.34         | 0.49-3.71               | 0.5683  |
| <b>Two or more sites of metastatic disease</b>                                                         | No                             | Yes                                       | 1.92         | 1.18-3.12               | 0.0082  |
| <b>Surgery and/or radiation</b>                                                                        | No                             | Yes                                       | 0.56         | 0.34-0.92               | 0.0231  |
| <b>Time from diagnosis to trial treatment</b>                                                          | ≤ 18 months                    | >18 months                                | 1.46         | 0.86-2.48               | 0.1659  |
| <b>Lymphocyte-to-monocyte ratio &lt; 2.8</b>                                                           | No                             | Yes                                       | 1.92         | 0.92-3.92               | 0.0801  |
| <b>CA19-9 &gt; 2000 IU/mL</b>                                                                          | No                             | Yes                                       | 1.94         | 1.20-3.14               | 0.0067  |
| <b>Albumin &lt; 3.4 g/dL</b>                                                                           | No                             | Yes                                       | 3.70         | 1.87-7.31               | 0.0002  |
| <b>Neuropathy</b>                                                                                      | No                             | Yes                                       | 0.70         | 0.44                    | 1.12    |
| <b>Diabetes mellitus</b>                                                                               | No                             | Yes                                       | 1.47         | 0.88-2.45               | 0.1461  |
| <b>Liver metastases</b>                                                                                | No                             | Yes                                       | 2.64         | 1.49-4.67               | 0.0009  |
| <b>Pulmonary metastases</b>                                                                            | No                             | Yes                                       | 0.70         | 0.37-1.30               | 0.2602  |
| <b>Peritoneal metastases</b>                                                                           | No                             | Yes                                       | 1.14         | 0.65-2.00               | 0.6389  |
| <b>NPC-1C staining score<sup>a</sup></b>                                                               | < 50%                          | ≥ 50%                                     | 1.16         | 0.72-1.86               | 0.5406  |
| <b>Neutrophil-to-lymphocyte ratio ≥ 5</b>                                                              | No                             | Yes                                       | 1.73         | 1.05-2.85               | 0.0300  |
| <b>Platelet-to-lymphocyte ratio ≥ 180</b>                                                              | No                             | Yes                                       | 1.50         | 0.91-2.47               | 0.1155  |
| <sup>a</sup> NPC-1C staining score was obtained via centralized immunohistochemical analysis.          |                                |                                           |              |                         |         |
| ECOG: Eastern Cooperative Oncology Group; IU/mL: International Units/milliliter; g/dL: grams/deciliter |                                |                                           |              |                         |         |

**eFigure 1: CONSORT Diagram for Patient Disposition**

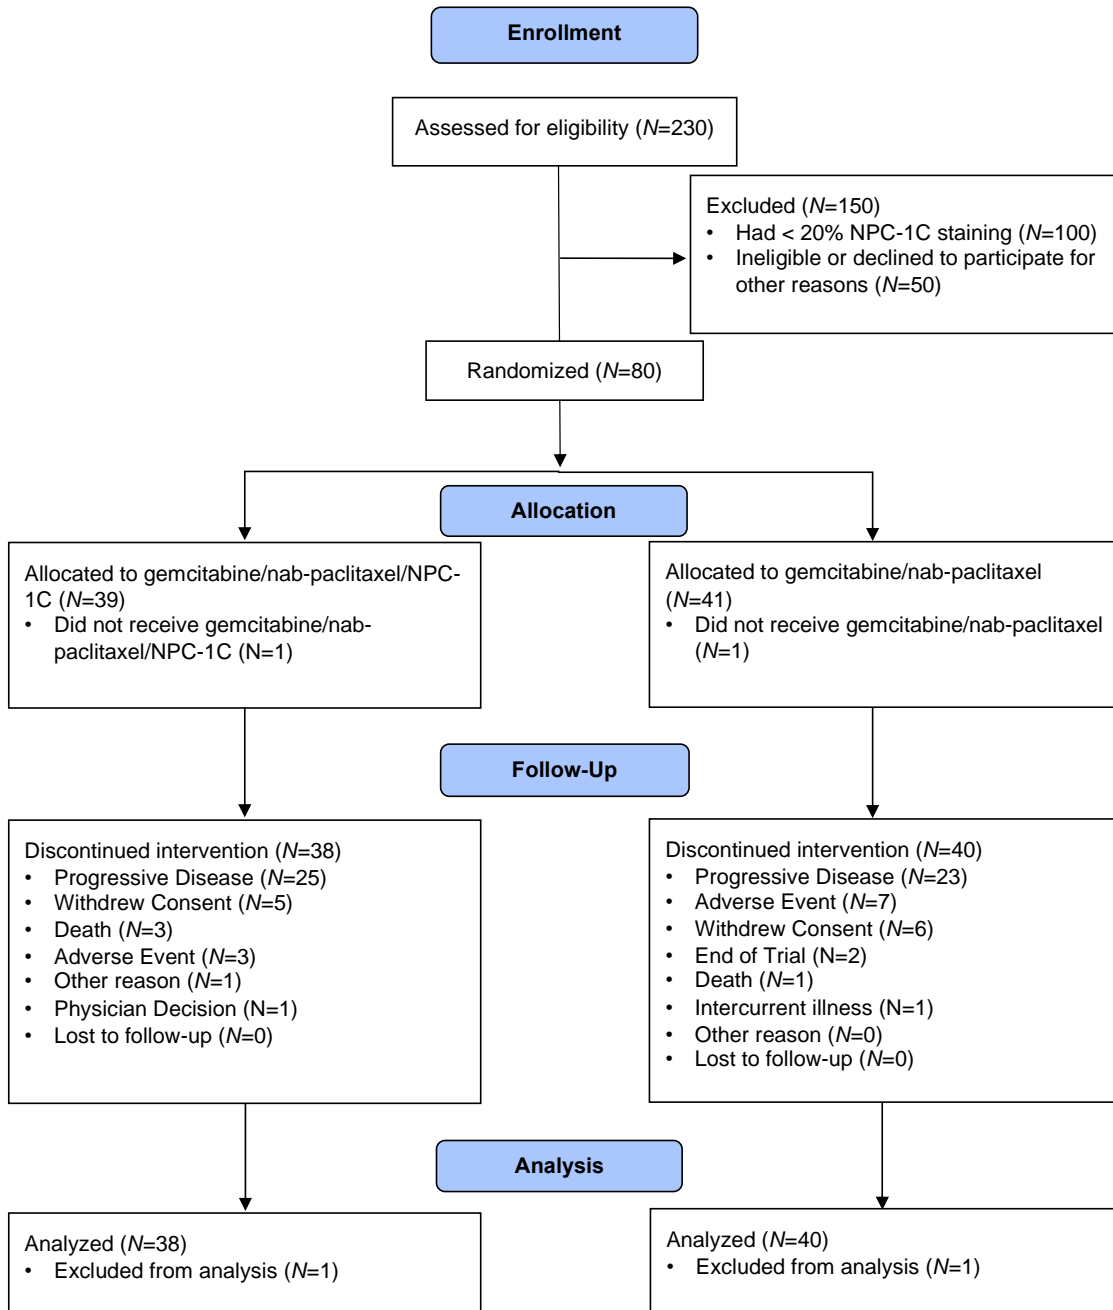

**eFigure 2: Subgroup Analysis of Demographic and Baseline Disease Characteristics in Relation to Overall Survival**

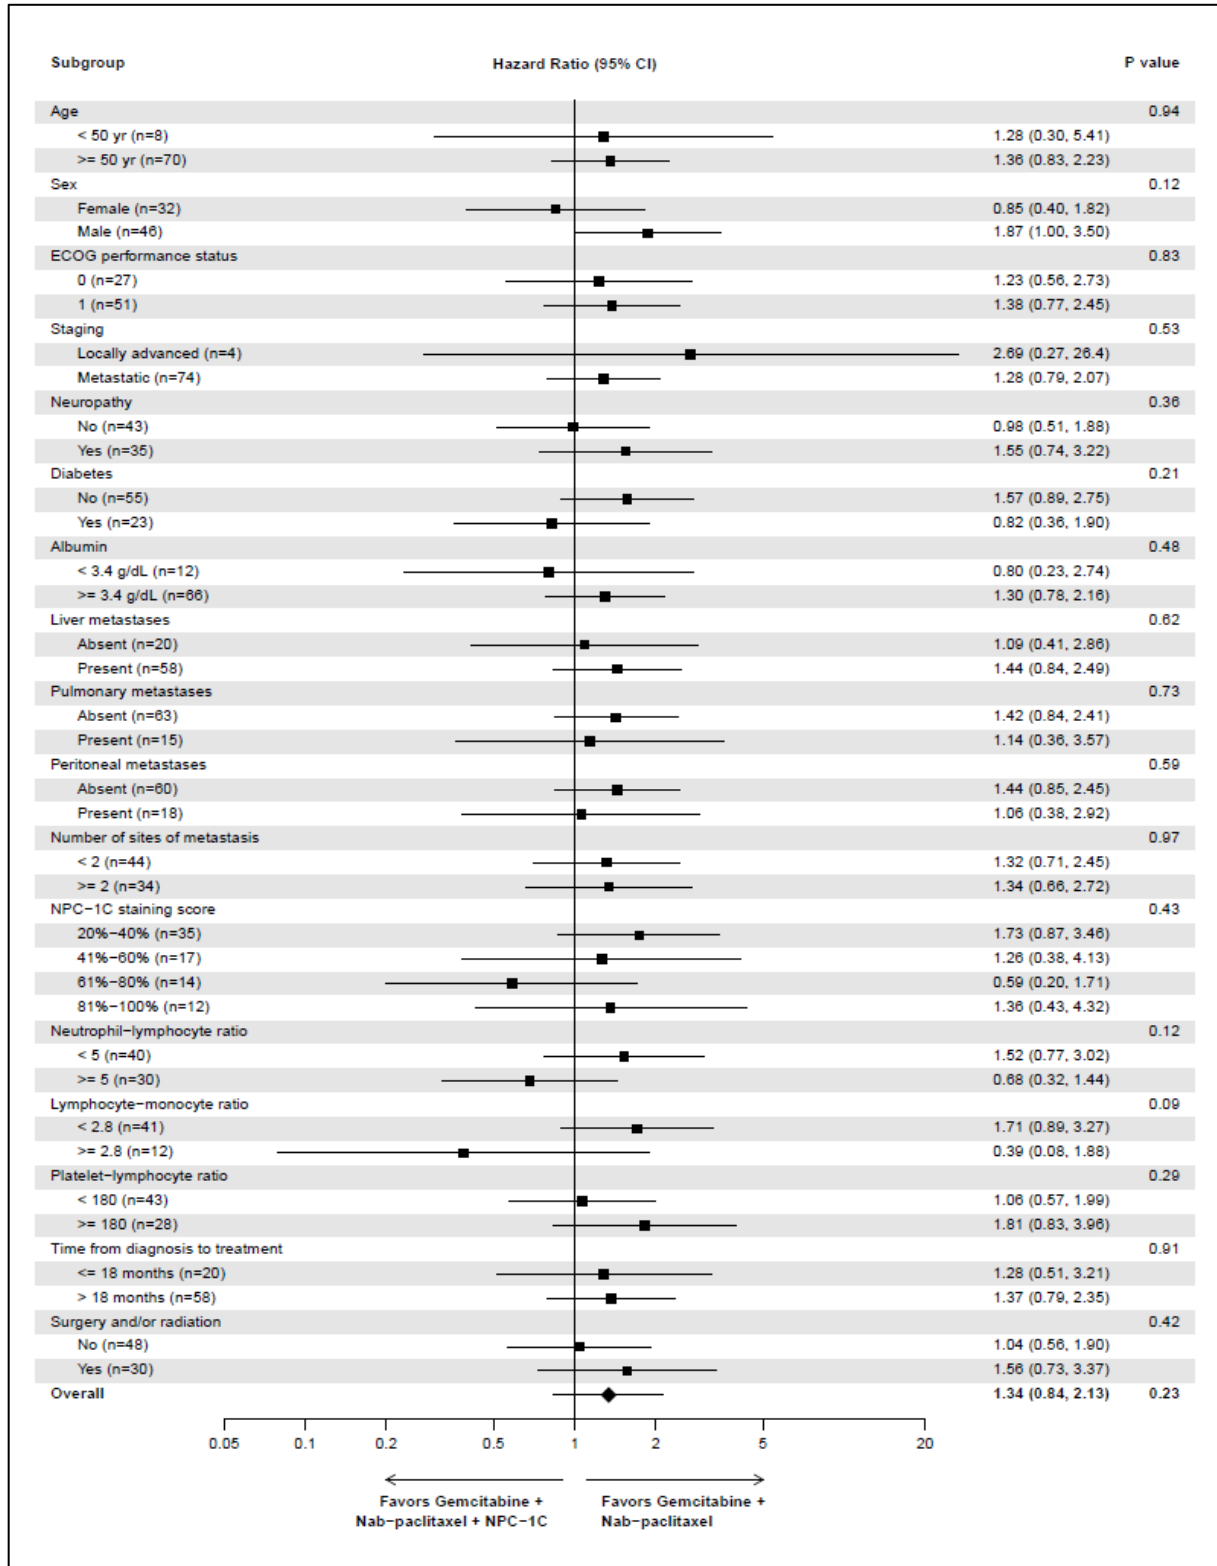

**eFigure 3: Overall Survival of Patients Based on Presence of Prognostic Factors**

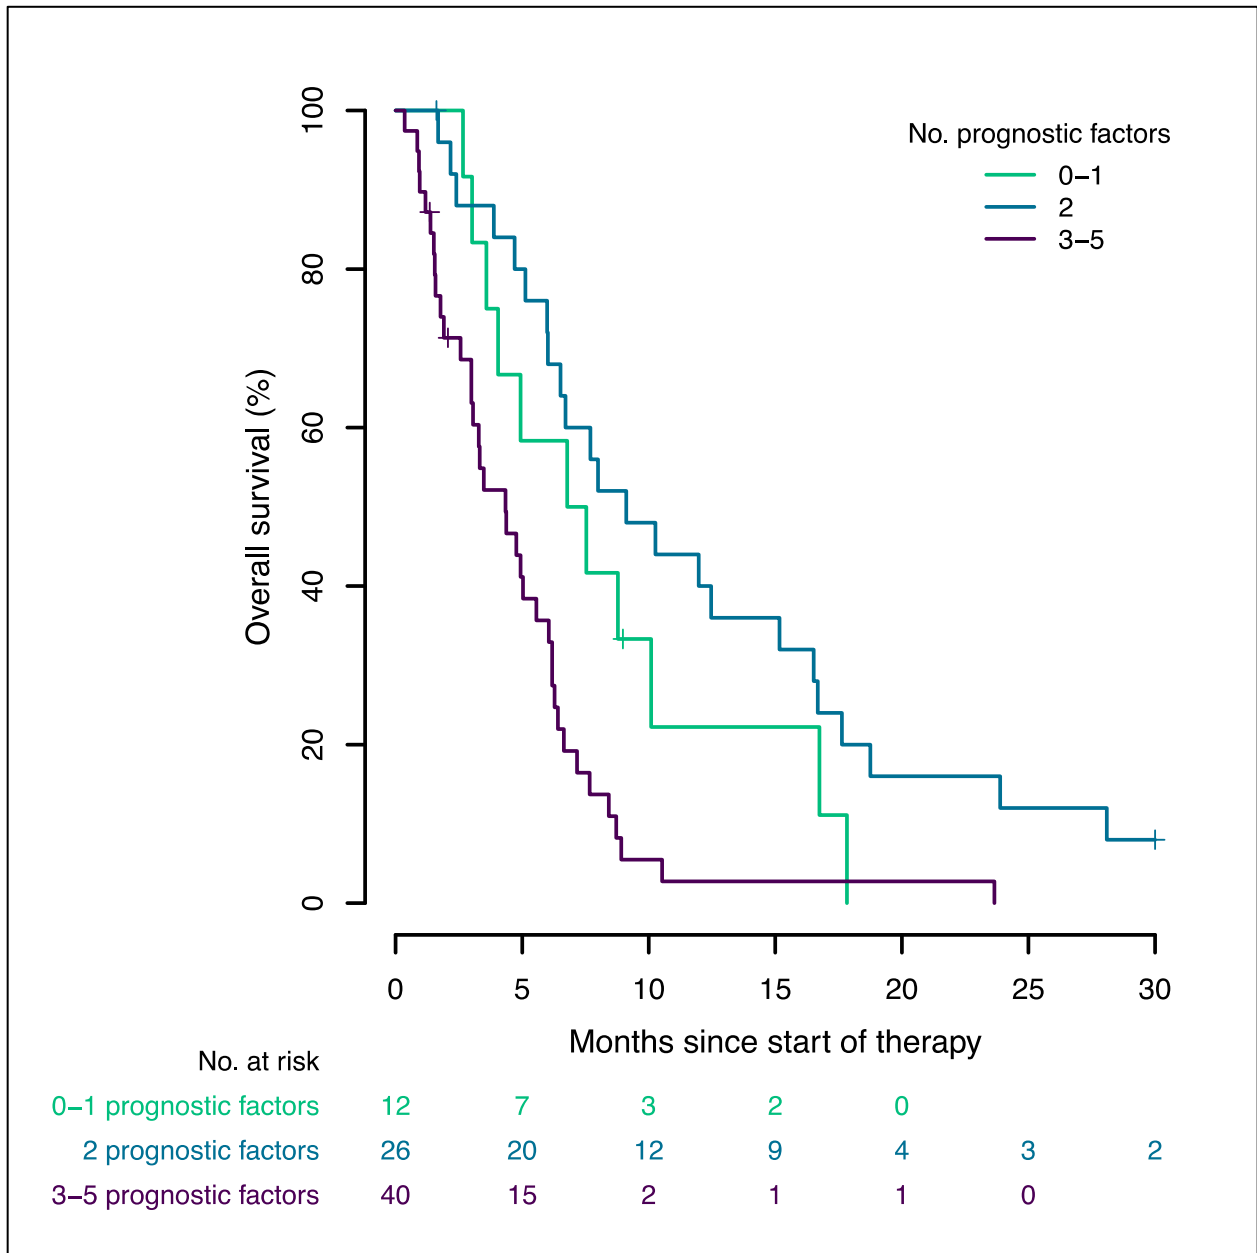

Supplement: jamanetwopen-e2249720-s002.pdf [file jamanetwopen-e2249720-s002.pdf]
