# Supplementary material for: Effect of a MUC5AC Antibody (NPC-1C) Administered With Second-Line Gemcitabine and Nab-Paclitaxel on the Survival of Patients With Advanced Pancreatic Ductal Adenocarcinoma: A Randomized Clinical Trial
Source: PubMed Central journal article supplement — JAMA Netw Open. 2023 Jan 5;6(1):e2249720. doi: 10.1001/jamanetworkopen.2022.49720 (PMC9856813; doi:10.1001/jamanetworkopen.2022.49720), 2023-01-05
Supplement: jamanetwopen-e2249720-s003.pdf [file jamanetwopen-e2249720-s003.pdf]

## Data Sharing Statement

Huffman. Effect of a MUC5AC Antibody (NPC-1C) Administered With Second-Line Gemcitabine and Nab-Paclitaxel on the Survival of Patients With Advanced Pancreatic Ductal Adenocarcinoma. *JAMA Netw Open*. Published January 05, 2023.  
doi:10.1001/jamanetworkopen.2022.49720

### Data

**Data available:** No

### Additional Information

**Explanation for why data not available:** We are constrained by IRB guidelines. However, any data sharing requests that we can do within IRB guidelines, we are happy to do.
